# Supplementary material for: A novel split kinesin assay identifies motor proteins that interact with distinct vesicle populations
Source: Oxford University Press journal article supplement (doi:10.1083/jcb.201205070), 2012-08-20
Supplement: jcb_201205070_sm.pdf [file jcb_201205070_sm.pdf]

Jenkins et al., <http://www.jcb.org/cgi/content/full/jcb.201205070/DC1>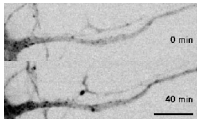

**Video 1. Vesicles that bind GFP-KIF1A tail are moved rapidly into the axon after chemical dimerization to a KIF5C<sup>559</sup> FKBP motor domain.** A hippocampal neuron transfected with a split kinesin consisting of an FRB-GFP-labeled KIF1A tail and a KIF5C<sup>559</sup>-FKBP motor domain and its axon is shown. Images were acquired by stream acquisition on a microscope (model TE2000; Nikon) equipped with a spinning-disk confocal head (model CSU10; Yokogawa Corporation of America). The movie shows KIF1A vesicle movement before and 40 min after the addition of the linker drug. 750-ms exposures were taken every 1.5 s during 96-s recordings (60 frames). The movie is sped up to 24x real time. Bar, 10  $\mu$ m.

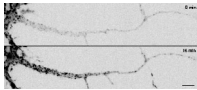

**Video 2. KIF13B tail binds TfR vesicles.** A hippocampal neuron transfected with TfR-GFP, the KIF5C<sup>559</sup>-FKBP motor domain, and FRB-3myc-KIF13B tail and its axon is shown. Images were acquired by stream acquisition on a spinning disk confocal microscope (model TE2000; Nikon) with a spinning-disk confocal-head (model CSU10; Yokogawa Corporation of America). The movie shows transport of TfR-GFP-labeled vesicles in the axon before and 16 min after the addition of the linker drug. 750-ms frames were taken every 750 ms during 96-s recordings (120 frames). The movie is sped up to 12x real time. Bar, 10  $\mu$ m.
